# Supplementary material for: Enhanced photocatalytic behavior and excellent electrochemical performance of hierarchically structured NiO microspheres
Source: Royal Society of Chemistry journal article supplement (doi:10.1039/c4ra04688a), 2014-01-01
Supplement: c4ra04688a1.pdf [file c4ra04688a1.pdf]

### Supporting Information

Enhanced photocatalytic behavior and excellent electrochemical performance of

hierarchically structured NiO microspheres

Xiong Wang<sup>\*a</sup>, Huimin Mao<sup>a</sup> and Yuchen Shan<sup>a</sup>

School of Materials Science and Engineering, Nanjing University of Science and Technology,

Nanjing 210094, China

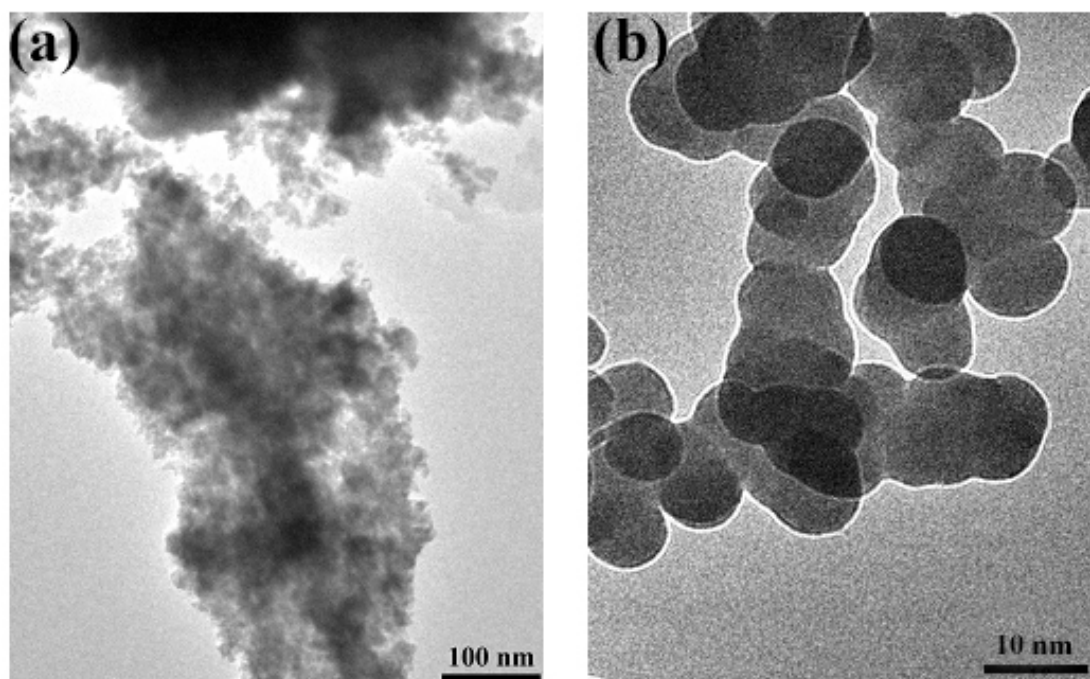

Fig. S1. TEM images of NiO nanoparticles prepared by thermal decomposition of nickel oxalate nanofibers.
